# Supplementary material for: Growth and structure of Nd3+-doped Li3Ba2Y3(WO4)8crystal with a disorder structure
Source: Royal Society of Chemistry journal article supplement (doi:10.1039/b914641e), 2009-12-21
Supplement: b914641e.pdf [file b914641e.pdf]

Table S1. Crystal data and structure refinement for Li<sub>3</sub>Ba<sub>2</sub>Y<sub>3</sub>(WO<sub>4</sub>)<sub>8</sub> crystal.

|                                   |                                                                                           |
|-----------------------------------|-------------------------------------------------------------------------------------------|
| Empirical formula                 | Li <sub>3</sub> Ba <sub>2</sub> Y <sub>3</sub> (WO <sub>4</sub> ) <sub>8</sub>            |
| Formula weight                    | 2544.93                                                                                   |
| Temperature                       | 293(2) K                                                                                  |
| Wavelength                        | 0.71073 Å                                                                                 |
| Crystal system, space group       | Monoclinic, C2/c                                                                          |
| Unit cell dimensions              | a = 5.181(2) Å, α = 90°<br>b = 12.677(7) Å, β = 92.237(13) °<br>c = 19.161(10) Å, γ = 90° |
| Volume                            | 1257.4(11) Å <sup>3</sup>                                                                 |
| Z                                 | 2                                                                                         |
| Calculated density                | 6.722 Mg/m <sup>3</sup>                                                                   |
| Absorption coefficient            | 46.449 mm <sup>-1</sup>                                                                   |
| F(000)                            | 2172                                                                                      |
| Crystal size                      | 0.1800×0.0600×0.0500 mm                                                                   |
| Theta range for data collection   | 3.19 – 27.48°                                                                             |
| Limiting indices                  | -6≤h≤6, -16≤k≤16, -24≤l≤24                                                                |
| Reflections collected / unique    | 5255 / 1439 [R(int) = 0.1660]                                                             |
| Completeness to θ = 27.48         | 99.5 %                                                                                    |
| Refinement method                 | Full-matrix least-squares on F <sup>2</sup>                                               |
| Data / restraints / parameters    | 1439 / 6 / 111                                                                            |
| Goodness-of-fit on F <sup>2</sup> | 1.054                                                                                     |
| Final R indices [ I > 2σ(I) ]     | R1 = 0.0463, wR2 = 0.0976                                                                 |
| R indices (all data)              | R1 = 0.0523, wR2 = 0.1009                                                                 |
| Extinction coefficient            | 0.00795(12)                                                                               |
| Largest diff. peak and hole       | 3.574 and -4.504 e.Å <sup>-3</sup>                                                        |

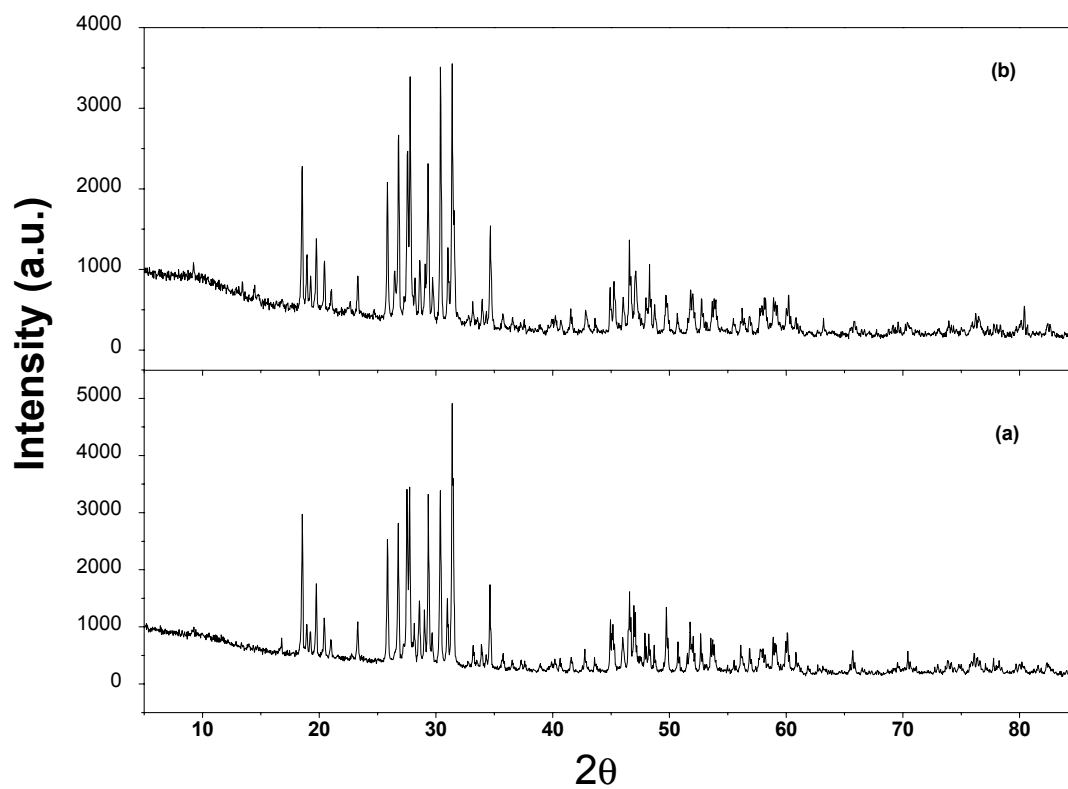

Fig S1. The X-ray powder diffraction patterns of: (a) the as-grown Nd<sup>3+</sup>-doped Li<sub>3</sub>Ba<sub>2</sub>Y<sub>3</sub>(WO<sub>4</sub>)<sub>8</sub> crystal from Li<sub>2</sub>WO<sub>4</sub>; (b) the sample synthesized by solid-state reaction.
